EDITORIAL

## *PLOS Genetics* 2015 Reviewer Thank You

The Public Library of Science (PLOS) and the *PLOS Genetics* editorial team would like to express our tremendous gratitude to all those individuals who participated in the peer review process this past year at *PLOS Genetics*. As a journal that is run by and for the scientific community, we depend upon you, the community, to communicate our best work. 2015 was great year for *PLOS Genetics*; during the year, over 3,100 reviewers from around the world helped evaluate over 1,190 articles.

The names of our 2015 reviewers are listed in [S1 Reviewer List](#). Thank you to all our reviewers for sharing your expertise with the *PLOS Genetics* authors. Your efforts are an important part of making the journal a highly valued Open Access resource created by and for the benefit of the scientific community.

### Supporting Information

**S1 Reviewer List. Alphabetical list of 2015 *PLOS Genetics* reviewers.**  
(PDF)

### Reference

1. (2015) *PLOS Genetics* 2014 Reviewer Thank You. *PLoS Gen* 11(2): e1005070. doi: [10.1371/journal.pgen.1005070](https://doi.org/10.1371/journal.pgen.1005070)

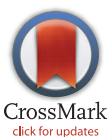

### OPEN ACCESS

**Citation:** (2016) *PLOS Genetics* 2015 Reviewer Thank You. *PLoS Genet* 12(2): e1005925.  
doi:10.1371/journal.pgen.1005925

**Published:** February 23, 2016

**Copyright:** © 2016 The PLOS Genetics Staff. This is an open access article distributed under the terms of the [Creative Commons Attribution License](#), which permits unrestricted use, distribution, and reproduction in any medium, provided the original author and source are credited.

**Funding:** The authors received no specific funding for this work.

**Competing Interests:** The authors have declared that no competing interests exist.
